# Supplementary material for: Genomic HEXploring allows landscaping of novel potential splicing regulatory elements
Source: PubMed Central journal article supplement — Nucleic Acids Res. 2014 Aug 21;42(16):10681–97. doi: 10.1093/nar/gku736 (PMC4176321; doi:10.1093/nar/gku736), 2014-08-21
Supplement: supp_gku736_nar-01130-a-2014-File010.pdf [file supp_gku736_nar-01130-a-2014-File010.pdf]

# Genomic HEXploring allows landscaping of novel potential splicing regulatory elements

Steffen Erkelenz, Stephan Theiss, Marianne Otte, Marek Widera, Jan Otto Peter and Heiner Schaal

## Supplemental Material

**Supplemental Figure 1.** As a complement to the quantification of spliced mRNA levels shown in Fig. 7, both spliced and unspliced messages are shown for all four mutations in HIV-1 exon 4 as key experiments (upper right panel). The remainder of Suppl. Fig. 1 corresponds to Fig. 7 and is shown here for completeness.

**Supplemental Figure 2.** Exonic splicing motif difference (ESMD) between mutant and reference sequence, derived from the well-established algorithms ESEfinder, RESCUE-ESE, FAS-ESS-hex3, PESX and PESR, is highly correlated with HEXplorer score difference in all 29 mutations of HIV-1 exons 1, 2, 2b, 3 and 4 also shown in Fig. 8 ( $r = 0.93$ ).

**Supplemental Figure 3.** Both (A) exon-intron hexamer score  $Z_{EI}$  and (B) weak-strong hexamer score  $Z_{WS}$  quantitatively correlate with ESRseq score ( $r = 0.72$ ) for 1,182 ESE and 1,090 ESS hexamers identified as exonic splicing regulatory elements by Ke et al. (2011).

**Supplemental Figure 4.** ESRseq score difference (mutant – reference) (Ke et al. (2011)) is highly correlated with HEXplorer score difference in all 29 mutations of HIV-1 exons 1, 2, 2b, 3 and 4 also shown in Fig. 8 ( $r = 0.93$ ).

**Supplemental Table 1.** Primers used for site-directed mutagenesis for LTR ex2 ex3 splicing reporters.

**Supplemental Table 2.** Primers used for site-directed mutagenesis for SV-*env* splicing reporters.

**Supplemental Table 3.** Primers used for semi-quantitative RT-PCR analyses.

## Reference:

Ke, S., Shang, S., Kalachikov, S.M., Morozova, I., Yu, L., Russo, J.J., Ju, J. and Chasin, L.A. (2011) Quantitative evaluation of all hexamers as exonic splicing elements. *Genome Res.*, 21, 1360-1374.

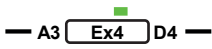

ESE<sup>5807-5838</sup>

5816G>T

5827G>T

5816G>T; 5827G>T (dm)

5816G>T; 5821G>T; 5827G>T (tm)

TACTCGACAGAGGAGAGCAAGAAATGGAGCCA

-----T-----

-----T-----

-----T-----T-----

-----T-----T-----T-----

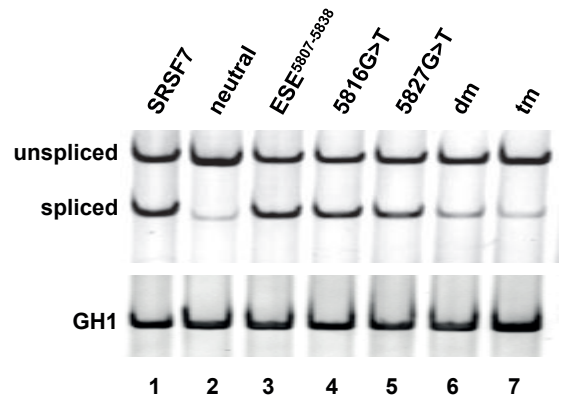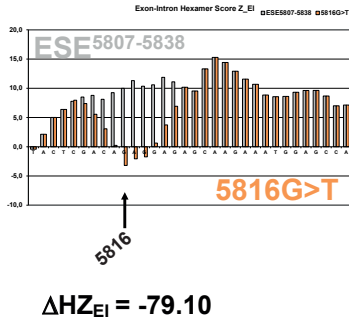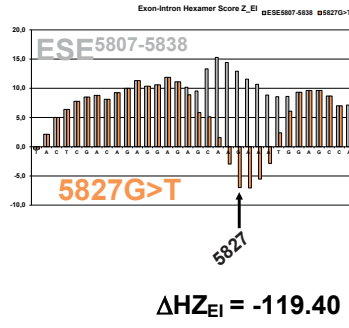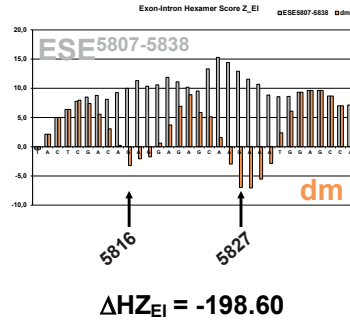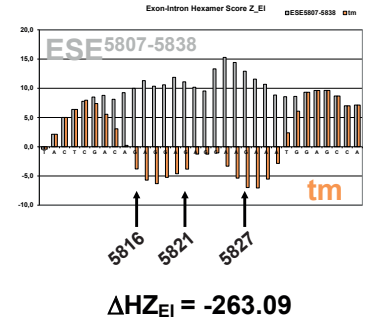

Supplemental Figure 1

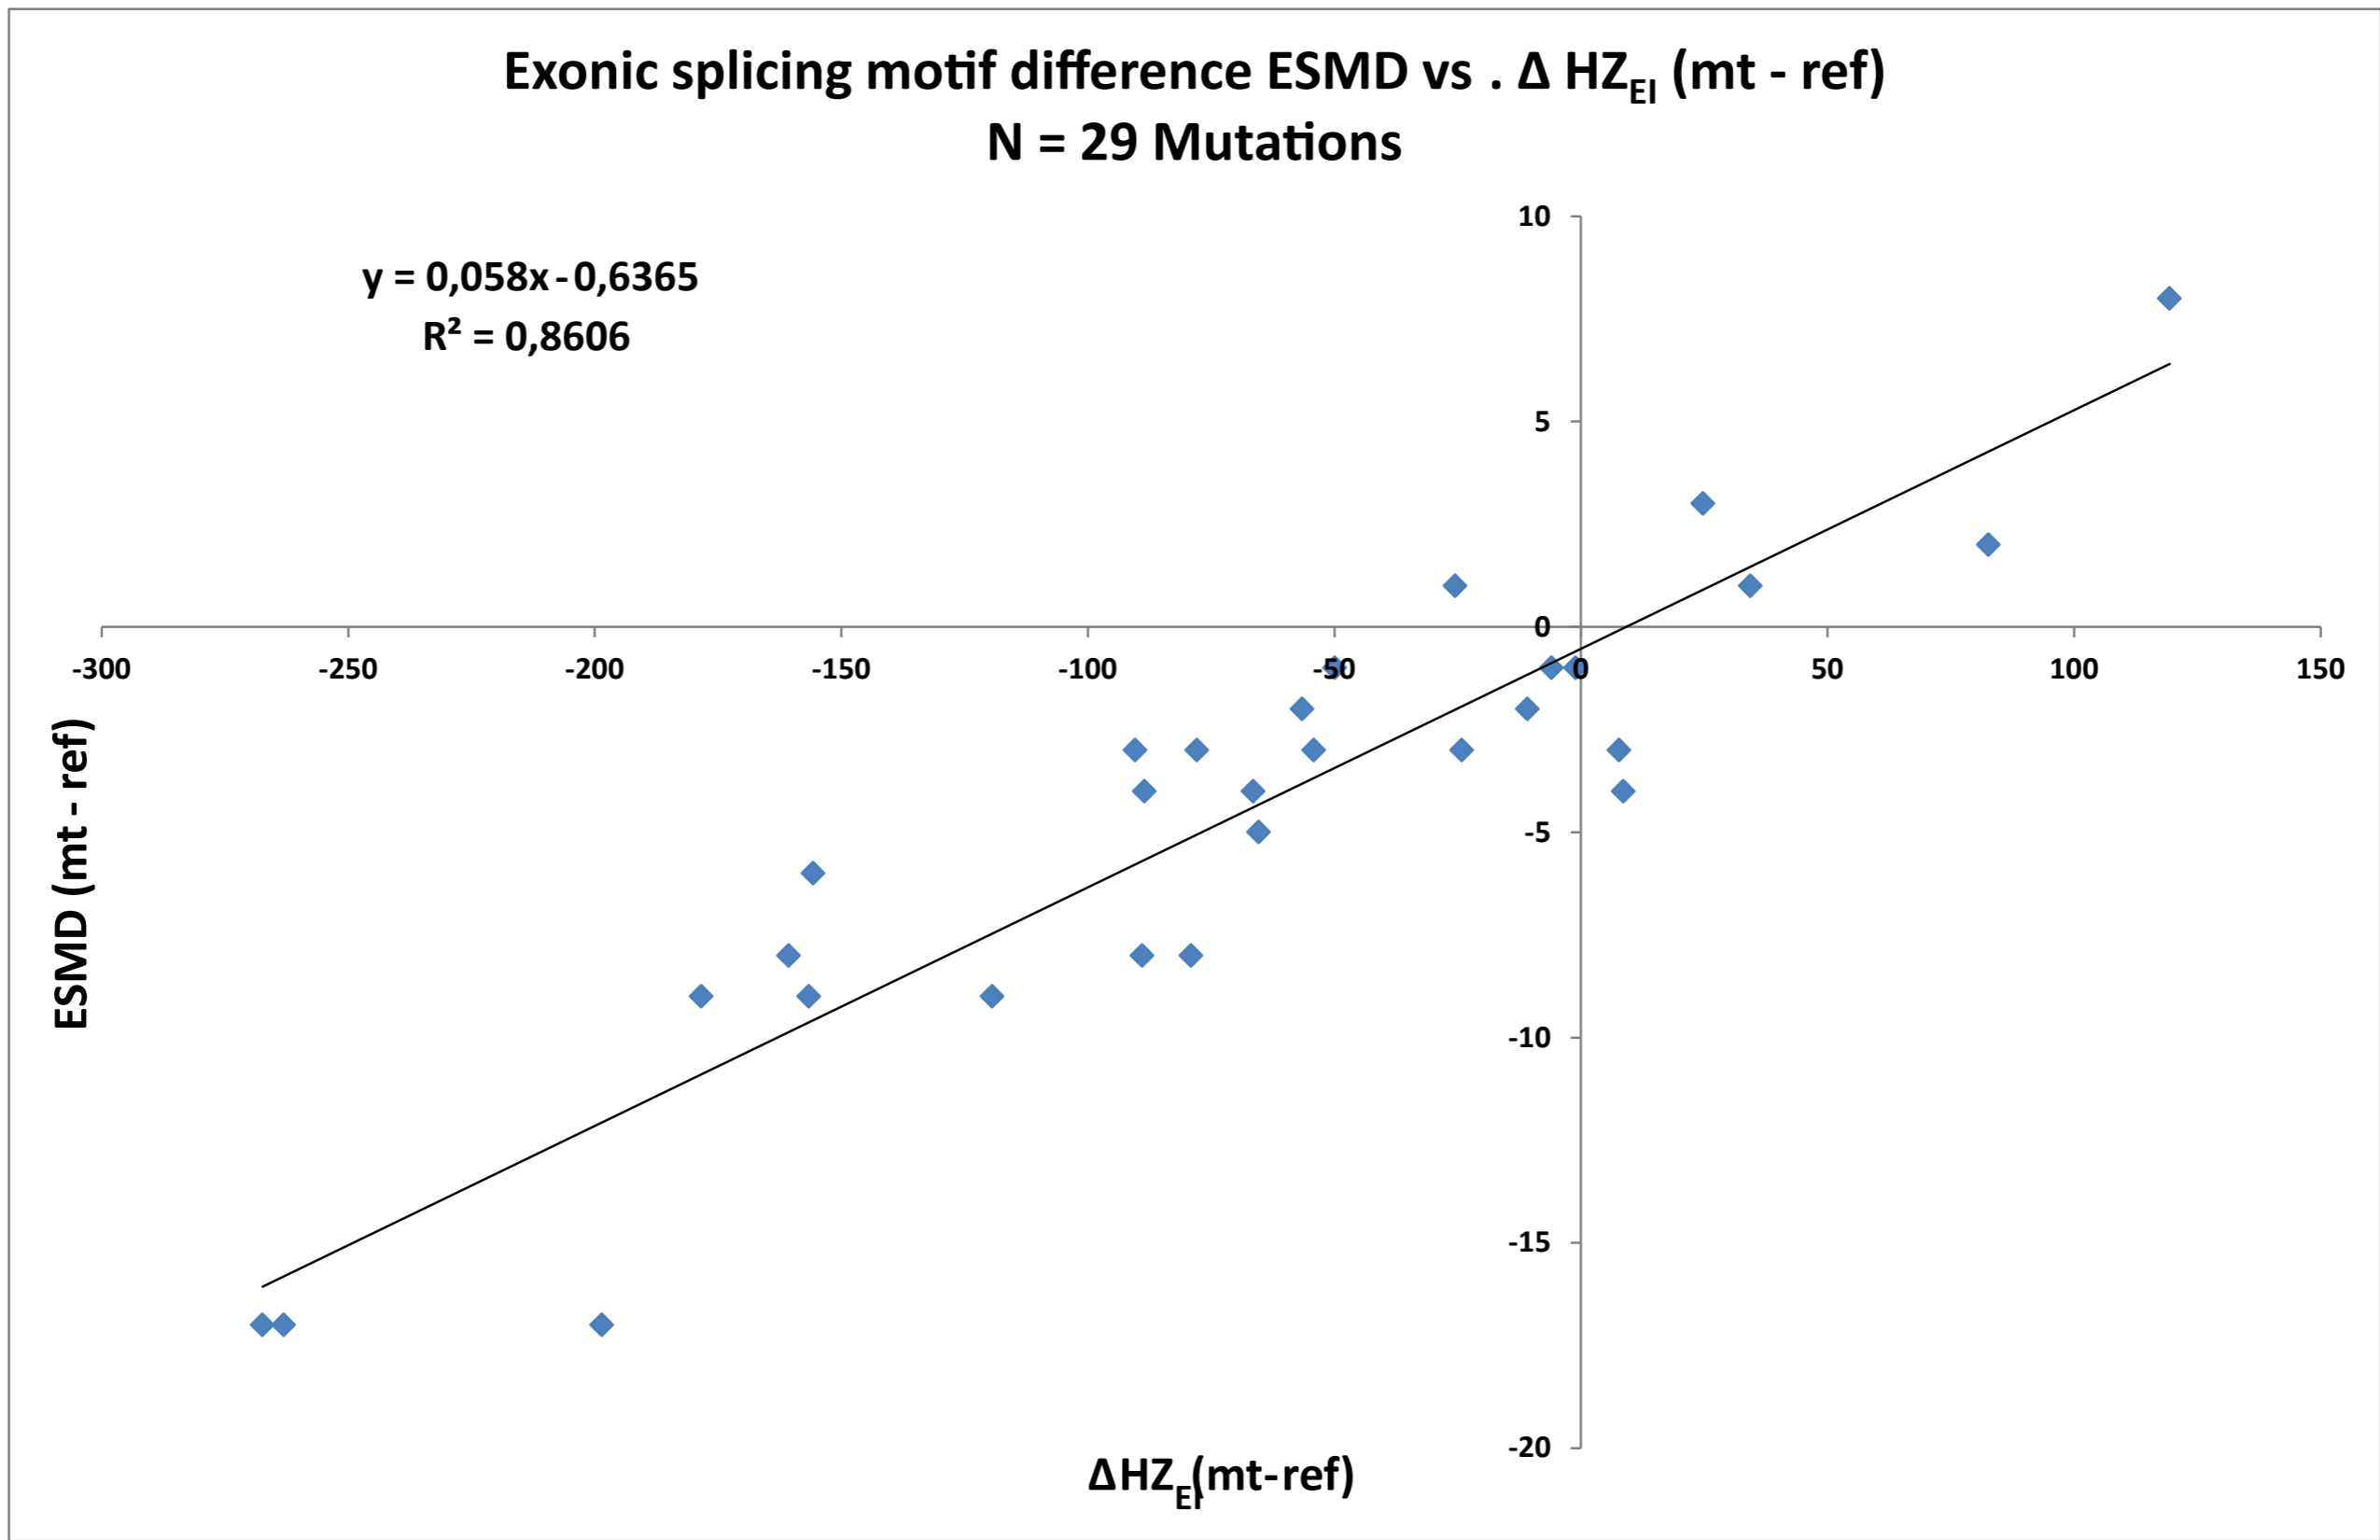

Supplemental Figure 2

**A**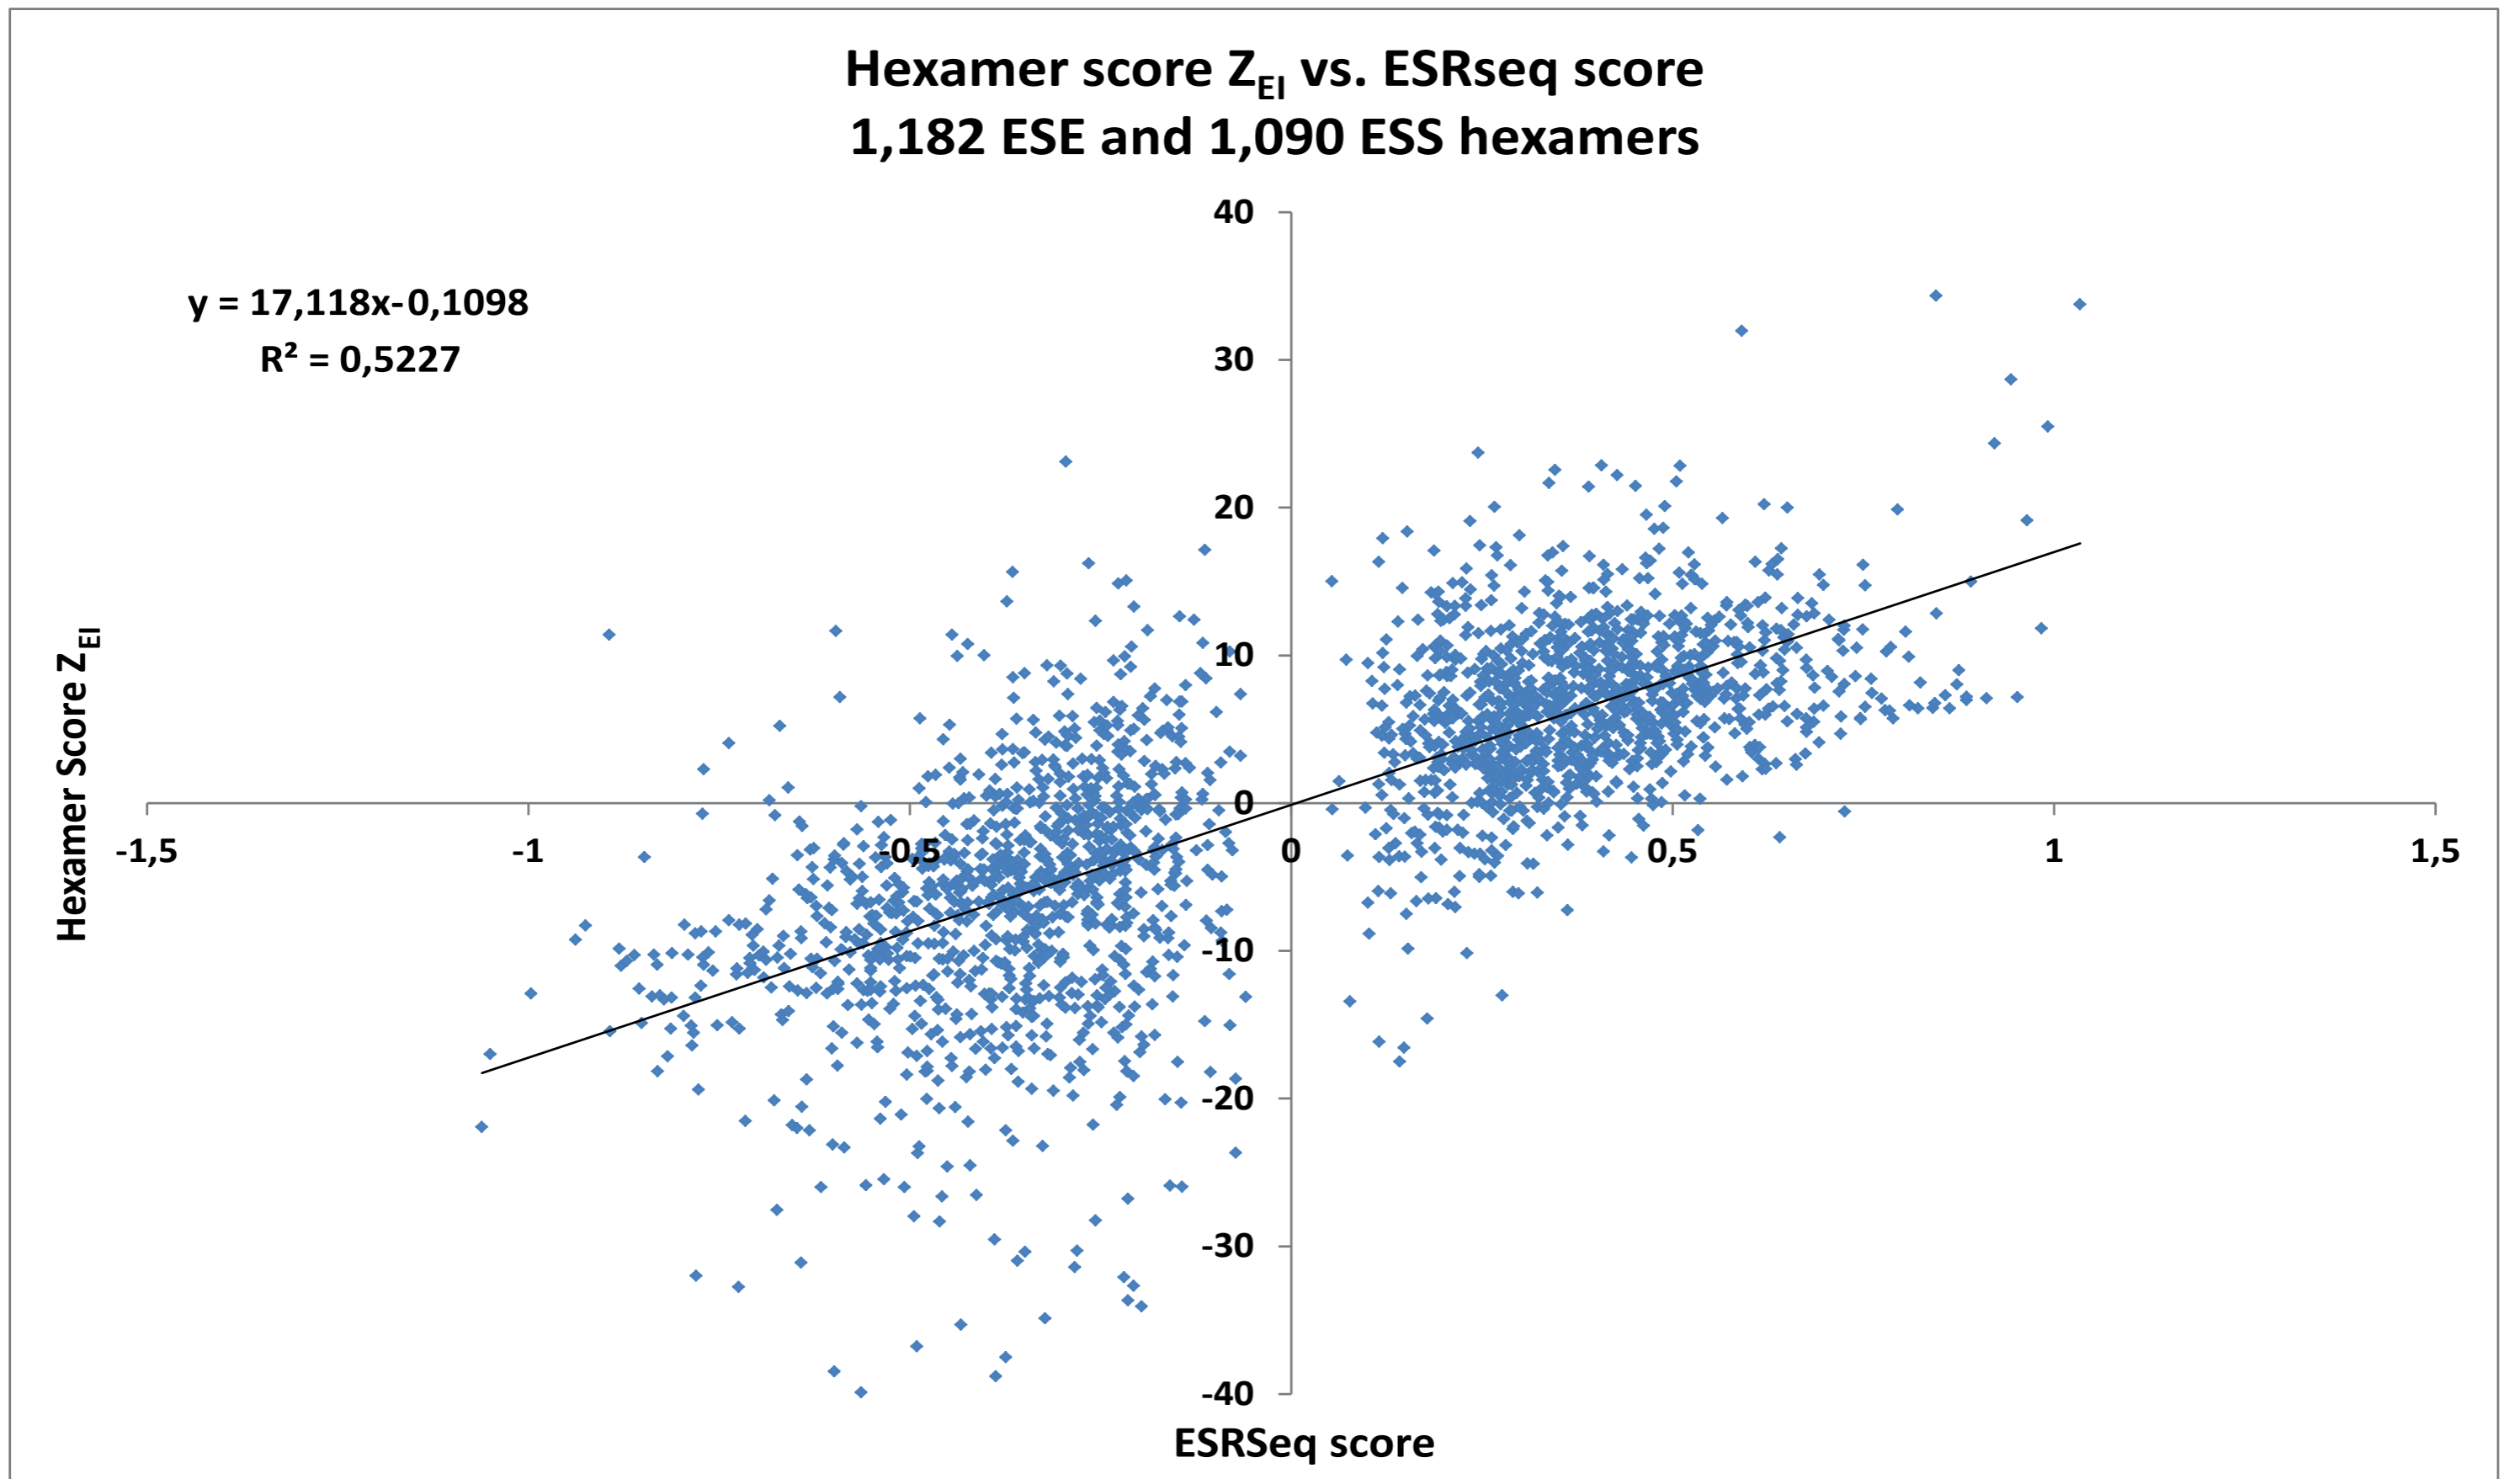**B**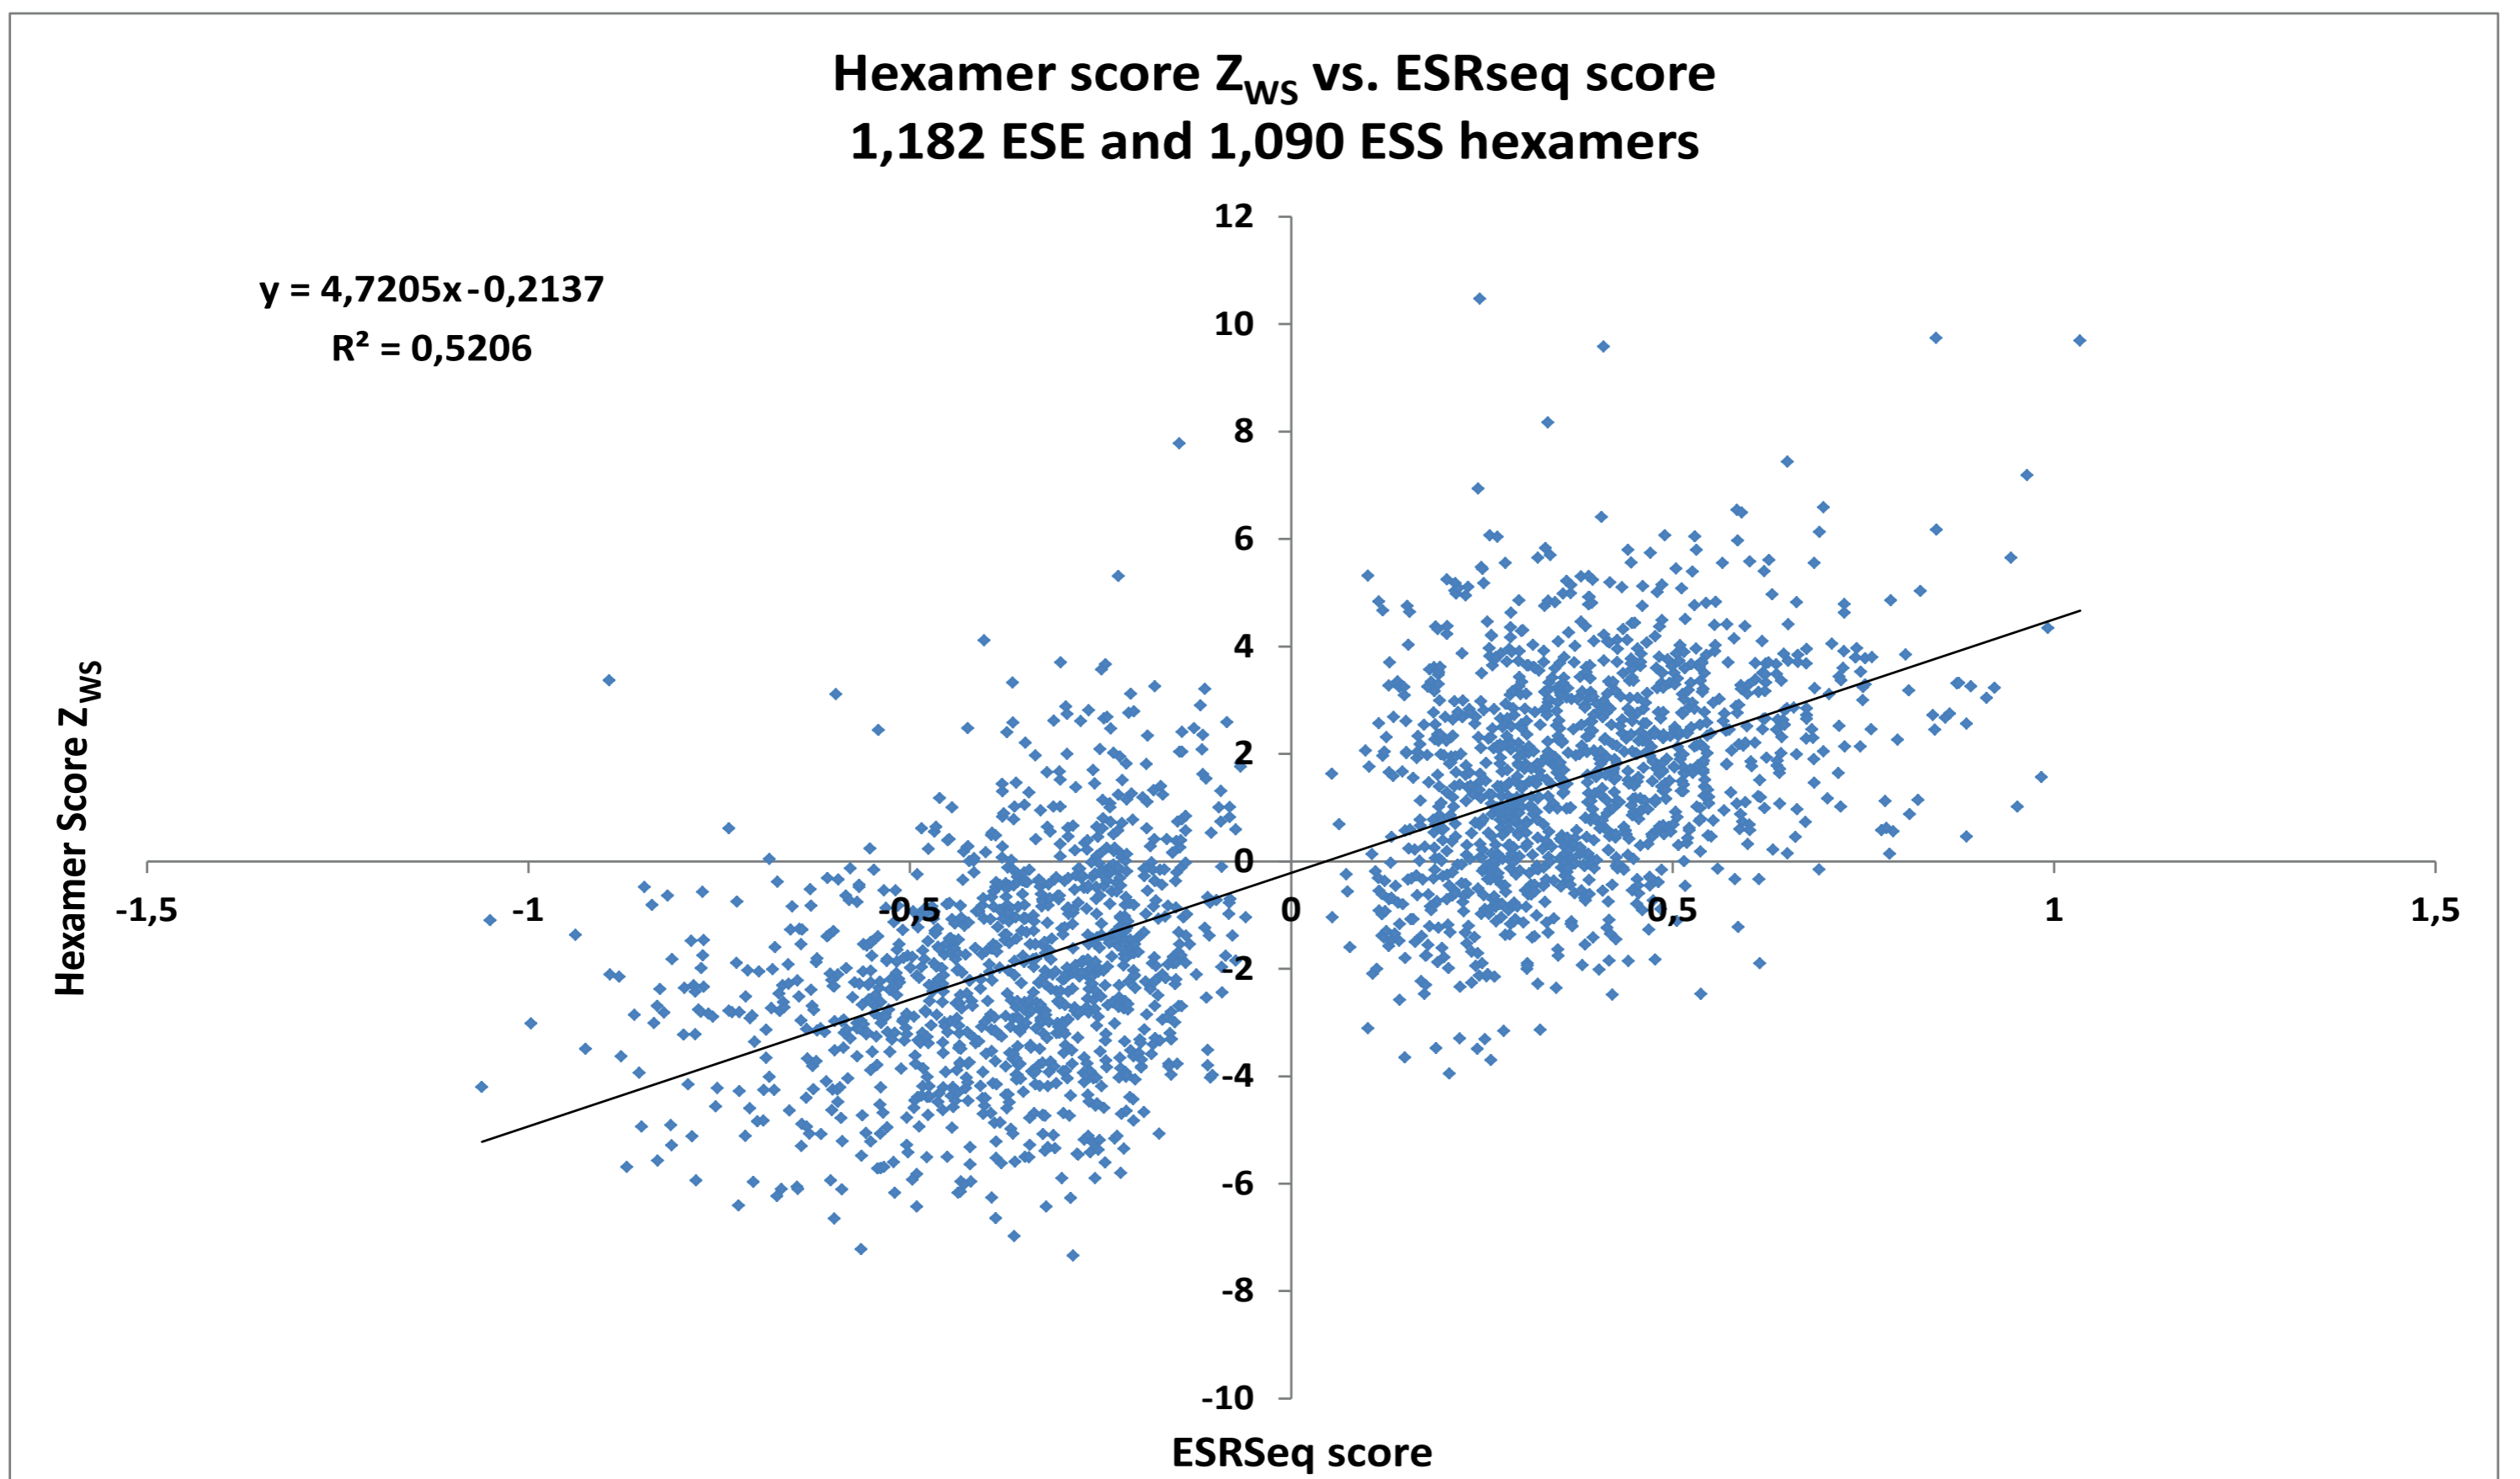

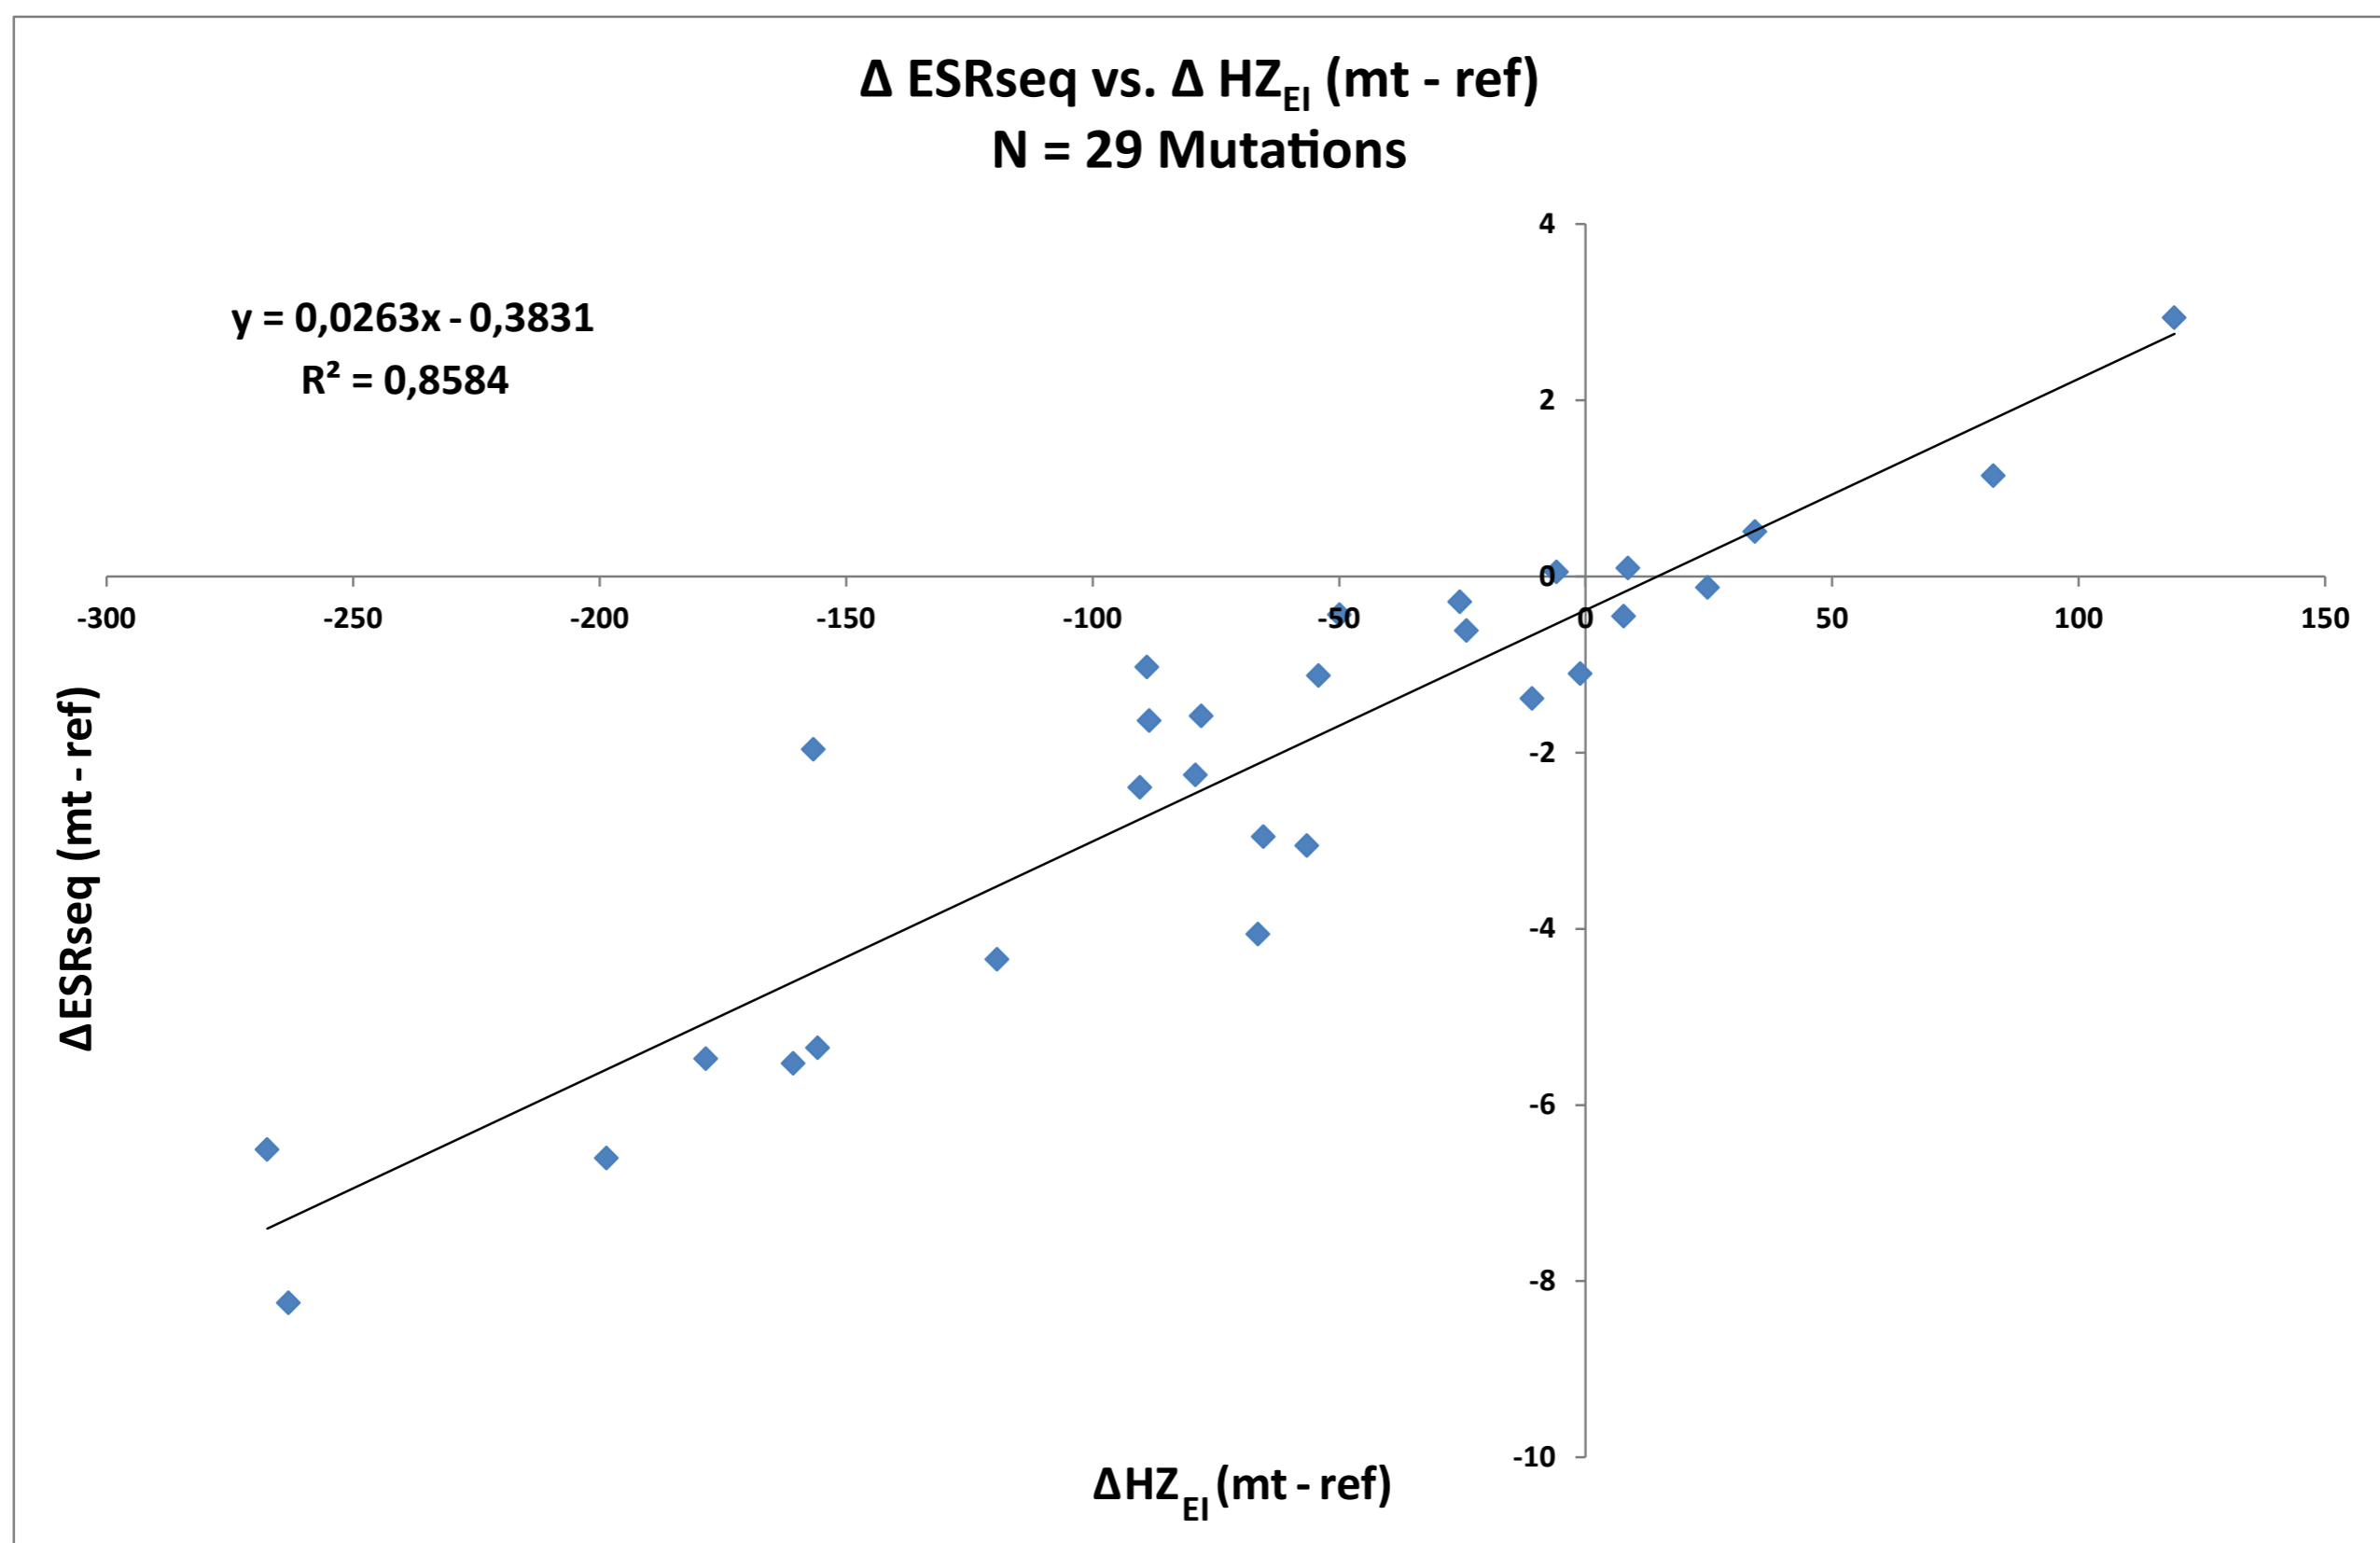

Supplemental Figure 4

# Genomic HEXploring allows landscaping of novel potential splicing regulatory elements

Steffen Erkelenz<sup>1</sup>, Stephan Theiss<sup>2</sup>, Marianne Otte<sup>3</sup>, Marek Widera<sup>1</sup>, Jan Otto Peter<sup>1</sup> and Heiner Schaal<sup>1,\*</sup>

## Supplemental Tables

**Supplemental Table 1.** LTR ex2 ex3 splicing reporters

| Cloned construct                         | Primer | Sequence                                                                                                                      |
|------------------------------------------|--------|-------------------------------------------------------------------------------------------------------------------------------|
| forward                                  |        |                                                                                                                               |
| LTR ex2 ex3 ESSV <sup>-</sup>            | #2949  | 5' TTT CAG ACT CTG CTA TAA GAA AGG CCT TAT TCT<br>GAC ACA TAG TTC TCC CTC TGT GTG AAT ATC AAG<br>CAG GAC ATA AC 3'            |
| LTR ex2 ex3 ESSV <sup>-</sup> ESE -24G>T | #2951  | 5' TTT CAG ACT CTG CTA TAA GAA AGG CCT TAT TCT<br>GAC ACA TAG TTC TCC CTC TGT GTT AAT ATC AAG<br>CAG GAC ATA ACA AGG 3'       |
| LTR ex2 ex3 ESSV <sup>-</sup> ESE -24G>A | #2986  | 5' TTT CAG ACT CTG CTA TAA GAA AGG CCT TAT TCT<br>GAC ACA TAG TTC TCC CTC TGT GTA AAT ATC AAG<br>CAG GAC ATA ACA AGG 3'       |
| LTR ex2 ex3 ESSV <sup>-</sup> ESE -17A>T | #2950  | 5' TTT CAG ACT CTG CTA TAA GAA AGG CCT TAT TCT<br>GAC ACA TAG TTC TCC CTC TGT GTG AAT ATC TAG<br>CAG GAC ATA ACA AGG TAG G 3' |
| LTR ex2 ex3 ESSV <sup>-</sup> ESE -17A>C | #2987  | 5' TTT CAG ACT CTG CTA TAA GAA AGG CCT TAT TCT<br>GAC ACA TAG TTC TCC CTC TGT GTG AAT ATC CAG<br>CAG GAC ATA ACA AGG TAG G 3' |
| LTR ex2 ex3 ESSV <sup>-</sup> ESE -17A>G | #3016  | 5' TTT CAG ACT CTG CTA TAA GAA AGG CCT TAT TCT<br>GAC ACA TAG TTC TCC CTC TGT GTT AAT ATC CAG                                 |

|                                                     |       |                                                                                                                                   |
|-----------------------------------------------------|-------|-----------------------------------------------------------------------------------------------------------------------------------|
|                                                     |       | CAG GAC ATA ACA AGG TAG G 3'                                                                                                      |
| LTR ex2 ex3 ESSV <sup>-</sup> ESE -15G>T,-<br>17A>T | #3017 | 5' TTT CAG ACT CTG CTA TAA GAA AGG CCT TAT TCT<br>GAC ACA TAG TTC TCC CTC TGT GTG AAT ATC TAT<br>CAG GAC ATA ACA AGG TAG GAT C 3' |
| LTR ex2 ex3 ESSV <sup>-</sup> ESE -24G>T,-<br>17A>T | #2985 | 5' TTT CAG ACT CTG CTA TAA GAA AGG CCT TAT TCT<br>GAC ACA TAG TTC TCC CTC TGT GTT AAT ATC TAG<br>CAG GAC ATA ACA AGG TAG G 3'     |
| LTR ex2 ex3 ESSV <sup>-</sup> ESE -24G>T,-<br>17A>C | #3015 | 5' TTT CAG ACT CTG CTA TAA GAA AGG CCT TAT TCT<br>GAC ACA TAG TTC TCC CTC TGT GTT AAT ATC CAG<br>CAG GAC ATA ACA AGG TAG G 3'     |
| LTR ex2 ex3 ESSV <sup>-</sup> ESE -15G>T            | #3202 | 5' TTT TCA GAC TCT GCT ATA AGA AAG GCC TTA TTC<br>TGA CAC ATA GTT CTC CCT CTG TGT GAA TAT CAA<br>TCA GGA CAT AAC AAG GTA GGA T    |
| LTR ex2 ex3 ESSV <sup>-</sup> ESE -15G>C            | #3203 | 5' TTT TCA GAC TCT GCT ATA AGA AAG GCC TTA TTC<br>TGA CAC ATA GTT CTC CCT CTG TGT GAA TAT CAA<br>CCA GGA CAT AAC AAG GTA GGA T 3' |
| LTR ex2 ex3 ESSV <sup>-</sup> ESE -26G>T            | #3204 | 5' TTT TCA GAC TCT GCT ATA AGA AAG GCC TTA TTC<br>TGA CAC ATA GTT CTC CCT CTG TTT GAA TAT CAA<br>GCA GGA CAT AAC AAG 3'           |
| LTR ex2 ex3 ESSV <sup>-</sup> ESE -26G>C            | #3205 | 5' TTT TCA GAC TCT GCT ATA AGA AAG GCC TTA TTC<br>TGA CAC ATA GTT CTC CCT CTG TCT GAA TAT CAA<br>GCA GGA CAT AAC AAG 3'           |
| LTR ex2 ex3 ESSV <sup>-</sup> ESE -21T>G            | #3206 | 5' TTT TCA GAC TCT GCT ATA AGA AAG GCC TTA TTC<br>TGA CAC ATA GTT CTC CCT CTG TGT GAA GAT CAA                                     |

|                                                    |       |                                                                                                                                                    |
|----------------------------------------------------|-------|----------------------------------------------------------------------------------------------------------------------------------------------------|
|                                                    |       | GCA GGA CAT AAC AAG GTA G 3'                                                                                                                       |
| LTR ex2 ex3 ESSV <sup>-</sup> ESE -21T>A           | #3207 | 5' TTT TCA GAC TCT GCT ATA AGA AAG GCC TTA TTC<br>TGA CAC ATA GTT CTC CCT CTG TGT GAA AAT CAA<br>GCA GGA CAT AAC AAG GTA G 3'                      |
| LTR ex2 ex3 ESSV <sup>-</sup> ESE -9C>A            | #3208 | 5' TTT TCA GAC TCT GCT ATA AGA AAG GCC TTA TTC<br>TGA CAC ATA GTT CTC CCT CTG TGT GAA TAT CAA<br>GCA GGA AAT AAC AAG GTA GGA TCT CTA CAA TAC<br>3' |
| LTR ex2 ex3 ESSV <sup>-</sup> ESE -9C>G            | #3209 | 5' TTT TCA GAC TCT GCT ATA AGA AAG GCC TTA TTC<br>TGA CAC ATA GTT CTC CCT CTG TGT GAA TAT CAA<br>GCA GGA GAT AAC AAG GTA GGA TCT CTA CAA TAC<br>3' |
| LTR ex2 ex3 ESSV <sup>-</sup> (pNEU)               | #3297 | 5' TTT TTC AGA ATC TGC TAT AAG AAA TAC CAT ATT<br>AGG ACG TAT AGT ATC GCC ACG TTG TGA ATA TCA<br>AGC AGG ACA TAA C 3'                              |
| LTR ex2 ex3 ESSV <sup>-</sup> (-36A>C)             | #4482 | 5' TTT TCA GAA TCT GCT ATA AGA AAT ACC ATA TTA<br>GGA CGT ATA GTT CGT CCT AGG TGT GAA TAT CAA<br>GCA GGA CA 3'                                     |
| LTR ex2 ex3 ESSV <sup>-</sup> (-29G>C)             | #4481 | 5' TTT TCA GAA TCT GCT ATA AGA AAT ACC ATA TTA<br>GGA CGT ATA GTT AGT CCT ACG TGT GAA TAT CAA<br>GCA GGA CAT AAC 3'                                |
| LTR ex2 ex3 ESSV <sup>-</sup> (-29G>C; -36A>C; dm) | #4483 | 5' TTT TCA GAA TCT GCT ATA AGA AAT ACC ATA TTA<br>GGA CGT ATA GTT CGT CCT ACG TGT GAA TAT CAA<br>GCA GGA CAT AAC 3'                                |



|         |       |                                 |
|---------|-------|---------------------------------|
| reverse |       |                                 |
| all     | #2588 | 5' CTT TAC GAT GCC ATT GGG A 3' |

**Supplemental Table 2.** SV-env splicing reporters

| Cloned construct                                            | Primer | Sequence                                                                            |
|-------------------------------------------------------------|--------|-------------------------------------------------------------------------------------|
| SV exon 3 D4-env and SV exon 3<br>ESSV <sup>-</sup> D4-env  | #1906  | 5' GAT CGA ATT CAC TCT GCT ATA AGA A 3'                                             |
|                                                             | #1907  | 5' GAT CGA GCT CCT TGT TAT GTC CTG C 3'                                             |
| SV exon 3 (part I) D4-env                                   | #1958  | 5' AAT TCA CTC TGC TAT AAG AAA GGC CTT ATG<br>AGC T 3'                              |
|                                                             | #1959  | 5' CAT AAG GCC TTT CTT ATA GCA GAG TG 3'                                            |
| SV exon 3 (part II) D4-env                                  | #1960  | 5' AAT TCT TTA GGA CAC ATA GTT AGC CCT AGG<br>GAG CT 3'                             |
|                                                             | #1961  | 5' CCC TAG GGC TAA CTA TGT GTC CTA AAG 3'                                           |
| SV exon 3 (part II ESSV <sup>-</sup> ) D4-env               | #1962  | 5' AAT TCT TTC TGA CAC ATA GTT CTC CCT CTG TGA<br>GCT 3'                            |
|                                                             | #1963  | 5' CAC AGA GGG AGA ACT ATG TGT CAG AAA G 3'                                         |
| SV exon 3 (part III) D4-env                                 | #1964  | 5' AAT TCT TGT GAA TAT CAA GCA GGA CAT AAC<br>GAG CT 3'                             |
|                                                             | #1965  | 5' CGT TAT GTC CTG CTT GAT ATT CAC AAG 3'                                           |
| SV ESE <sup>705-29</sup> D1-env/eGFP                        | #4473  | 5' AAT AAG AAT TCG CTG AAG CGC GCA CGG CAA<br>GAG GCG GAG CTC CTG GTG AGT ACC TT 3' |
|                                                             | #640   | 5' CAA TAC TAC TTC TTG TGG GTT GG 3'                                                |
| SV ESE <sup>705-29</sup> 708G>T; 718C>G<br>(dm) D1-env/eGFP | #4474  | 5' AAT AAG AAT TCG CTG TAG CGC GCA GGG CAA<br>GAG GCG GAG CTC CTG GTG AGT ACC TT 3' |

|                                                                |       |                                                                                                 |
|----------------------------------------------------------------|-------|-------------------------------------------------------------------------------------------------|
|                                                                | #640  | 5' CAA TAC TAC TTC TTG TGG GTT GG 3'                                                            |
| SV ESE <sup>4932-62</sup> D1-env/eGFP                          | #4476 | 5' AAT AAG AAT TCT GGA AAG GAC CAG CAA AGC<br>TCC TCT GGA AAG GAG CTC CTG GTG AGT ACC TT 3'     |
|                                                                | #640  | 5' CAA TAC TAC TTC TTG TGG GTT GG 3'                                                            |
| SV ESE <sup>4932-62</sup> 4942C>T; 4947A>T<br>(dm) D1-env/eGFP | #4477 | 5' AAT AAG AAT TCT GGA AAG GAC TAG CAT AGC<br>TCC TCT GGA AAG GAG CTC CTG GTG AGT ACC TT 3'     |
|                                                                | #640  | 5' CAA TAC TAC TTC TTG TGG GTT GG 3'                                                            |
| SV ESE <sup>5807-38</sup> D1-env/eGFP                          | #4430 | 5' AAT AAG AAT TCT ACT CGA CAG AGG AGA GCA<br>AGA AAT GGA GCC AGA GCT CCT GGT GAG TAC CTT<br>3' |
|                                                                | #640  | 5' CAA TAC TAC TTC TTG TGG GTT GG 3'                                                            |
| SV ESE <sup>5807-38</sup> 5816G>T D1-<br>env/eGFP              | #4431 | 5' AAT AAG AAT TCT ACT CGA CAT AGG AGA GCA<br>AGA AAT GGA GCC AGA GCT CCT GGT GAG TAC CTT<br>3' |
|                                                                | #640  | 5' CAA TAC TAC TTC TTG TGG GTT GG 3'                                                            |
| SV ESE <sup>5807-38</sup> 5827G>T D1-<br>env/eGFP              | #4432 | 5' AAT AAG AAT TCT ACT CGA CAG AGG AGA GCA<br>ATA AAT GGA GCC AGA GCT CCT GGT GAG TAC CTT<br>3' |
|                                                                | #640  | 5' CAA TAC TAC TTC TTG TGG GTT GG 3'                                                            |
| SV ESE <sup>5807-38</sup> 5816G>T; 5827G>T<br>(dm) D1-env/eGFP | #4433 | 5' AAT AAG AAT TCT ACT CGA CAT AGG AGA GCA<br>ATA AAT GGA GCC AGA GCT CCT GGT GAG TAC CTT<br>3' |
|                                                                | #640  | 5' CAA TAC TAC TTC TTG TGG GTT GG 3'                                                            |

|                                                                         |       |                                                                                                             |
|-------------------------------------------------------------------------|-------|-------------------------------------------------------------------------------------------------------------|
| SV ESE <sup>5807-38</sup> 5816G>T; 5821G>T;<br>5827G>T (tm) D1-env/eGFP | #4434 | 5' AAT AAG AAT TCT ACT CGA CAT AGG ATA GCA<br>ATA AAT GGA GCC AGA GCT CCT GGT GAG TAC CTT<br>3'             |
|                                                                         | #640  | 5' CAA TAC TAC TTC TTG TGG GTT GG 3'                                                                        |
| SV ESE <sup>5005-32</sup> D1-env/eGFP                                   | #4965 | 5' GGG CCT AGG AAT TCT AGT GCC AAG AAG AAA<br>AGC AAA GAT CAT GAG CTC CTG GTG AGT ACC TTA<br>AGC TCT CCG 3' |
|                                                                         | #640  | 5' CAA TAC TAC TTC TTG TGG GTT GG 3'                                                                        |
| SV ESE <sup>5005-32</sup> 5015A>T D4-<br>env/eGFP                       | #4966 | 5' GGG CCT AGG AAT TCT AGT GCC AAG TAG AAA<br>AGC AAA GAT CAT GAG CTC CTG GTG AGT ACC TTA<br>AGC TCT CCG 3' |
|                                                                         | #640  | 5' CAA TAC TAC TTC TTG TGG GTT GG 3'                                                                        |
| SV ESE <sup>5005-32</sup> 5025A>T D4-<br>env/eGFP                       | #4967 | 5' GGG CCT AGG AAT TCT AGT GCC AAG AAG AAA<br>AGC ATA GAT CAT GAG CTC CTG GTG AGT ACC TTA<br>AGC TCT CCG 3' |
|                                                                         | #640  | 5' CAA TAC TAC TTC TTG TGG GTT GG 3'                                                                        |
| SV ESE <sup>5005-32</sup> 5015A>T; 5025A>T<br>(dm) D4-env/eGFP          | #4968 | 5' GGG CCT AGG AAT TCT AGT GCC AAG TAG AAA<br>AGC ATA GAT CAT GAG CTC CTG GTG AGT ACC TTA<br>AGC TCT CCG 3' |
|                                                                         | #640  | 5' CAA TAC TAC TTC TTG TGG GTT GG 3'                                                                        |

**Supplemental Table 3.** Primers used for semi-quantitative RT-PCR

| Cloned construct             | Primer     | Sequence                                 |
|------------------------------|------------|------------------------------------------|
| Reporter mRNAs (LTR ex2 ex3) | #1544      | 5' CTT GAA AGC GAA AGT AAA GC 3'         |
|                              | #2588      | 5' CTT TAC GAT GCC ATT GGG A 3'          |
|                              | #3210      | 5' TGA GGA GGC TTT TTT GGA GG 3'         |
|                              | #3211      | 5' TTC ACT AAT CGA ATG GAT CTG TC 3'     |
| GH1 (transfection control)   | #1224      | 5' TCT TCC AGC CTC CCA TCA GCG TTT GG 3' |
|                              | #1225      | 5' CAA CAG AAA TCC AAC CTA GAG CTG CT 3' |
| viral mRNA classes           | #1544 (E1) | 5' CTT GAA AGC GAA AGT AAA GC 3'         |
|                              | #3392 (E7) | 5' CGT CCC AGA TAA GTG CTA AGG 3'        |
|                              | #640 (I4)  | 5' CAA TAC TAC TTC TTG TGG GTT GG 3'     |
|                              | #3632 (E4) | 5' TGG ATG CTT CCA GGG CTC 3'            |
